# Supplementary material for: Pattern Recognition of the COVID-19 Pandemic in the United States: Implications for Disease Mitigation
Source: PubMed Central journal article supplement (PMC7967616; doi:10.3390/ijerph18052493), 2021-03-03
Supplement: ijerph-18-02493-s001.pdf [file ijerph-18-02493-s001.pdf]

**Table S1.** The number of COVID-19 case in each state of the US by December 12, 2020.

| <b>State</b>   | <b>Abbreviation</b> | <b>Cases</b> |
|----------------|---------------------|--------------|
| California     | CA                  | 1550914      |
| Texas          | TX                  | 1414437      |
| Florida        | FL                  | 1120014      |
| Illinois       | IL                  | 851796       |
| New York       | NY                  | 766441       |
| Georgia        | GA                  | 566401       |
| Ohio           | OH                  | 555172       |
| Pennsylvania   | PA                  | 486284       |
| Michigan       | MI                  | 470148       |
| Wisconsin      | WI                  | 468469       |
| Tennessee      | TN                  | 454571       |
| North Carolina | NC                  | 432243       |
| Indiana        | IN                  | 420586       |
| New Jersey     | NJ                  | 413543       |
| Arizona        | AZ                  | 402919       |
| Minnesota      | MN                  | 378481       |
| Missouri       | MO                  | 352524       |
| Alabama        | AL                  | 292848       |
| Colorado       | CO                  | 286830       |
| Massachusetts  | MA                  | 286385       |
| Virginia       | VA                  | 279917       |
| Louisiana      | LA                  | 275614       |
| Iowa           | IA                  | 256966       |
| South Carolina | SC                  | 249399       |
| Oklahoma       | OK                  | 234795       |
| Maryland       | MD                  | 232644       |
| Utah           | UT                  | 232091       |
| Kentucky       | KY                  | 222437       |
| Washington     | WA                  | 203604       |
| Kansas         | KS                  | 189809       |
| Arkansas       | AR                  | 189218       |
| Nevada         | NV                  | 185193       |
| Mississippi    | MS                  | 178995       |
| Nebraska       | NE                  | 149133       |
| Connecticut    | CT                  | 148785       |
| Idaho          | ID                  | 121850       |
| New Mexica     | NM                  | 120528       |
| Rhode Island   | RI                  | 113234       |
| Oregon         | OR                  | 93006        |
| South Dakota   | SD                  | 90615        |
| North Dakota   | ND                  | 87836        |
| Montana        | MT                  | 73165        |
| West Virginia  | WV                  | 62553        |
| Delaware       | DE                  | 45633        |
| Alaska         | AK                  | 40522        |
| Wyoming        | WY                  | 39220        |
| New Hampshire  | NH                  | 31167        |
| Hawaii         | HI                  | 19602        |
| Maine          | ME                  | 15943        |
| Vermont        | VT                  | 5891         |

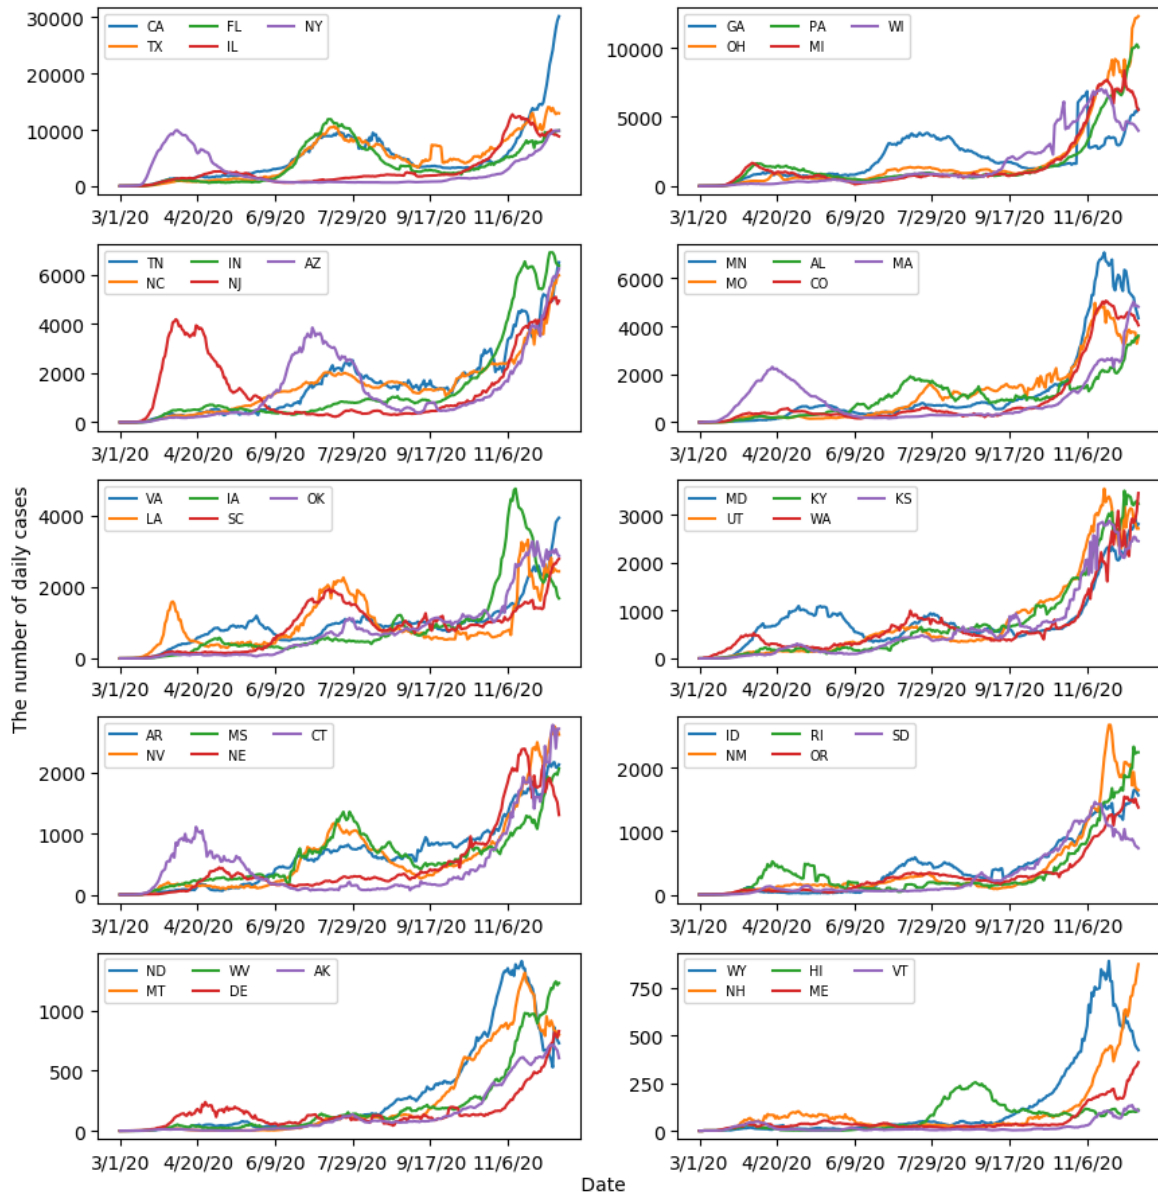

**Figure S1.** Trends of Covid-19 cases in 50 states during March 1-December 12, 2020 using untransformed data.
